# Supplementary material
Source: ML conference proceedings conference paper supplement (https://proceedings.mlr.press/v33/hoffman14.html)
Supplement: Supplementary file 1 [file hoffman14-supp.pdf]

## A Theorem 2

The proof of this section and the lemmas of the next section follow from the proofs of Gabillon et al. [2012]. The modifications we have made to this proof correspond to the introduction of the function  $g_k$  which bounds the uncertainty  $s_k$  in order to make it simpler to introduce other models. We also introduce a sufficient condition on this bound, i.e. that it is monotonically decreasing in  $N$  in order to bound the arm pulls with respect to  $g_k^{-1}$ . Ultimately, this form of the theorem reduces the problem of proving a regret bound to that of checking a few properties of the uncertainty model.

**Theorem 2.** *Consider a bandit problem with horizon  $T$  and  $K$  arms. Let  $U_k(t)$  and  $L_k(t)$  be upper and lower bounds that hold for all times  $t \leq T$  and all arms  $k \leq K$  with probability  $1 - \delta$ . Finally, let  $g_k$  be a monotonically decreasing function such that  $s_k(t) \leq g_k(N_k(t - 1))$  and  $\sum_k g_k^{-1}(H_{k\epsilon}) \leq T - K$ . We can then bound the simple regret as*

$$\Pr(R_{\Omega_T} \leq \epsilon) \geq 1 - KT\delta. \quad (10)$$

*Proof.* We will first define the event  $\mathcal{E}$  such that on this event every mean is bounded by its associated bounds for all times  $t$ . More precisely we can write this as

$$\mathcal{E} = \{\forall k \leq K, \forall t \leq T, L_k(t) \leq \mu_k \leq U_k(t)\}.$$

By definition, these bounds are given such that the probability of deviating from a single bound is  $\delta$ . Using a union bound we can then bound the probability of remaining within all bounds as  $\Pr(\mathcal{E}) \geq 1 - KT\delta$ .

We will next condition on the event  $\mathcal{E}$  and assume regret of the form  $R_{\Omega_T} > \epsilon$  in order to reach a contradiction. Upon reaching said contradiction we can then see that the simple regret must be bounded by  $\epsilon$  with probability given by the probability of event  $\mathcal{E}$ , as stated above. As a result we need only show that a contradiction occurs.

We will now define  $\tau = \arg \min_{t \leq T} B_{J(t)}(t)$  as the time at which the recommended arm attains the minimum bound, i.e.  $\Omega_T = J(\tau)$  as defined in (8). Let  $t_k \leq T$  be the last time at which arm  $k$  is pulled. Note that each arm must be pulled at least once due to the initialization phase. We can then show the following sequence of inequalities:

$$\begin{aligned} \min(0, s_k(t_k) - \Delta_k) + s_k(t_k) &\geq B_{J(t_k)}(t_k) & (a) \\ &\geq B_{\Omega_T}(\tau) & (b) \\ &\geq R_{\Omega_T} & (c) \\ &> \epsilon. & (d) \end{aligned}$$

Of these inequalities, (a) holds by Lemma B3, (c) holds by Lemma B1, and (d) holds by our assumption on

the simple regret. The inequality (b) holds due to the definition  $\Omega_T$  and time  $\tau$ . Note, that we can also write the preceding inequality as two cases

$$\begin{aligned} s_k(t_k) &> 2s_k(t_k) - \Delta_k > \epsilon, & \text{if } \Delta_k > s_k(t_k); \\ 2s_k(t_k) - \Delta_k &\geq s_k(t_k) > \epsilon, & \text{if } \Delta_k \leq s_k(t_k) \end{aligned}$$

This leads to the following bound on the confidence diameter,

$$s_k(t_k) > \max(\frac{1}{2}(\Delta_k + \epsilon), \epsilon) = H_{k\epsilon}$$

which can be obtained by a simple manipulation of the above equations. More precisely we can notice that in each case,  $s_k(t_k)$  upper bounds both  $\epsilon$  and  $\frac{1}{2}(\Delta_k + \epsilon)$ , and thus it obviously bounds their maximum.

Now, for any arm  $k$  we can consider the final number of arm pulls, which we can write as

$$\begin{aligned} N_k(T) &= N_k(t_k - 1) + 1 \leq g^{-1}(s_k(t_k)) + 1 \\ &< g^{-1}(H_{k\epsilon}) + 1. \end{aligned}$$

This holds due to the definition of  $g$  as a monotonic decreasing function, and the fact that we pull each arm at least once during the initialization stage. Finally, by summing both sides with respect to  $k$  we can see that  $\sum_k g^{-1}(H_{k\epsilon}) + K > T$ , which contradicts our definition of  $g$  in the Theorem statement.  $\square$

## B Lemmas

In order to simplify notation in this section, we will first introduce  $B(t) = \min_k B_k(t)$  as the minimizer over all gap indices for any time  $t$ . We will also note that this term can be rewritten as

$$B(t) = B_{J(t)}(t) = U_{j(t)}(t) - L_{J(t)}(t),$$

which holds due to the definitions of  $j(t)$  and  $J(t)$ .

**Lemma B1.** *For any sub-optimal arm  $k \neq k^*$ , any time  $t \in \{1, \dots, T\}$ , and on event  $\mathcal{E}$ , the immediate regret of pulling that arm is upper bounded by the index quantity, i.e.  $B_k(t) \geq R_k$ .*

*Proof.* We can start from the definition of the bound and expand this term as

$$\begin{aligned} B_k(t) &= \max_{i \neq k} U_i(t) - L_k(t) \\ &\geq \max_{i \neq k} \mu_i - \mu_k = \mu^* - \mu_k = R_k. \end{aligned}$$

The first inequality holds due to the assumption of event  $\mathcal{E}$ , whereas the following equality holds since we are only considering sub-optimal arms, for which the best alternative arm is obviously the optimal arm.  $\square$

**Lemma B2.** For any time  $t$  let  $k = a_t$  be the arm pulled, for which the following statements hold:

$$\begin{aligned} \text{if } k = j(t), \text{ then } L_{j(t)}(t) &\leq L_{J(t)}(t), \\ \text{if } k = J(t), \text{ then } U_{j(t)}(t) &\leq U_{J(t)}(t). \end{aligned}$$

*Proof.* We can divide this proof into two cases based on which of the two arms is selected.

**Case 1:** let  $k = j(t)$  be the arm selected. We will then assume that  $L_{j(t)}(t) > L_{J(t)}(t)$  and show that this is a contradiction. By definition of the arm selection rule we know that  $s_{j(t)}(t) \geq s_{J(t)}(t)$ , from which we can easily deduce that  $U_{j(t)}(t) > U_{J(t)}(t)$  by way of our first assumption. As a result we can see that

$$\begin{aligned} B_{j(t)}(t) &= \max_{j \neq j(t)} U_j(t) - L_{j(t)}(t) \\ &< \max_{j \neq J(t)} U_j(t) - L_{J(t)}(t) = B_{J(t)}(t). \end{aligned}$$

This inequality holds due to the fact that arm  $j(t)$  must necessarily have the highest upper bound over all arms. However, this contradicts the definition of  $J(t)$  and as a result it must hold that  $L_{j(t)}(t) \leq L_{J(t)}(t)$ .

**Case 2:** let  $k = J(t)$  be the arm selected. The proof follows the same format as that used for  $k = j(t)$ .  $\square$

**Corollary B2.** If arm  $k = a_t$  is pulled at time  $t$ , then the minimum index is bounded above by the uncertainty of arm  $k$ , or more precisely

$$B(t) \leq s_k(t).$$

*Proof.* We know that  $k$  must be restricted to the set  $\{j(t), J(t)\}$  by definition. We can then consider the case that  $k = j(t)$ , and by Lemma B2 we know that this imposes an order on the lower bounds of each possible arm, allowing us to write

$$B(t) \leq U_{j(t)}(t) - L_{j(t)}(t) = s_{j(t)}(t)$$

from which our corollary holds. We can then easily see that a similar argument holds for  $k = J(t)$  by ordering the upper bounds, again via Lemma B2.  $\square$

**Lemma B3.** On event  $\mathcal{E}$ , for any time  $t \in \{1, \dots, T\}$ , and for arm  $k = a_t$  the following bound holds on the minimal gap,

$$B(t) \leq \min(0, s_k(t) - \Delta_k) + s_k(t).$$

*Proof.* In order to prove this lemma we will consider a number of cases based on which of  $k \in \{j(t), J(t)\}$  is selected and whether or not one or neither of these arms corresponds to the optimal arm  $k^*$ . Ultimately, this results in six cases, the first three of which we will present are based on selecting arm  $k = j(t)$ .

**Case 1:** consider  $k^* = k = j(t)$ . We can then see that the following sequence of inequalities holds,

$$\mu_{(2)} \stackrel{(a)}{\geq} \mu_{J(t)}(t) \stackrel{(b)}{\geq} L_{J(t)}(t) \stackrel{(c)}{\geq} L_{j(t)}(t) \stackrel{(d)}{\geq} \mu_k - s_k(t).$$

Here (b) and (d) follow directly from event  $\mathcal{E}$  and (c) follows from Lemma B2. Inequality (a) follows trivially from our assumption that  $k = k^*$ , as a result  $J(t)$  can only be as good as the 2nd-best arm. Using the definition of  $\Delta_k$  and the fact that  $k = k^*$ , the above inequality yields

$$s_k(t) - (\mu_k - \mu_{(2)}) = s_k(t) - \Delta_k \geq 0$$

Therefore the min in the result of Lemma B3 vanishes and the result follows from Corollary B2.

**Case 2:** consider  $k = j(t)$  and  $k^* = J(t)$ . We can then write

$$\begin{aligned} B(t) &= U_{j(t)}(t) - L_{J(t)}(t) \\ &\leq \mu_{j(t)}(t) + s_{j(t)}(t) - \mu_{J(t)}(t) + s_{J(t)}(t) \\ &\leq \mu_k - \mu^* + 2s_k(t) \end{aligned}$$

where the first inequality holds from event  $\mathcal{E}$ , and the second holds because by definition the selected arm must have higher uncertainty. We can then simplify this as

$$\begin{aligned} &= 2s_k(t) - \Delta_k \\ &\leq \min(0, s_k(t) - \Delta_k) + s_k(t), \end{aligned}$$

where the last step evokes Corollary B2.

**Case 3:** consider  $k = j(t) \neq k^*$  and  $J(t) \neq k^*$ . We can then write the following sequence of inequalities,

$$\mu_{j(t)}(t) + s_{j(t)}(t) \stackrel{(a)}{\geq} U_{j(t)}(t) \stackrel{(b)}{\geq} U_{k^*}(t) \stackrel{(c)}{\geq} \mu^*.$$

Here (a) and (c) hold due to event  $\mathcal{E}$  and (b) holds since by definition  $j(t)$  has the highest upper bound other than  $J(t)$ , which in turn is not the optimal arm by assumption in this case. By simplifying this expression we obtain  $s_k(t) - \Delta_k \geq 0$ , and hence the result follows from Corollary B2 as in Case 1.

**Cases 4–6:** consider  $k = J(t)$ . The proofs for these three cases follow the same general form as the above cases and is omitted. Cases 1 through 6 cover all possible scenarios and prove Lemma B3.  $\square$

**Lemma B4.** Consider a normally distributed random variable  $X \sim \mathcal{N}(\mu, \sigma^2)$  and  $\beta \geq 0$ . The probability that  $X$  is within a radius of  $\beta\sigma$  from its mean can then be written as

$$\Pr(|X - \mu| \leq \beta\sigma) \geq 1 - e^{-\beta^2/2}.$$

*Proof.* Consider  $Z \sim \mathcal{N}(0, 1)$ . The probability that  $Z$  exceeds some positive bound  $c > 0$  can be written

$$\begin{aligned} \Pr(Z > c) &= \frac{e^{-c^2/2}}{\sqrt{2\pi}} \int_c^\infty e^{(c^2-z^2)/2} dz \\ &= \frac{e^{-c^2/2}}{\sqrt{2\pi}} \int_c^\infty e^{-(z-c)^2/2-c(z-c)} dz \\ &\leq \frac{e^{-c^2/2}}{\sqrt{2\pi}} \int_c^\infty e^{-(z-c)^2/2} dz = \frac{1}{2}e^{-c^2/2}. \end{aligned}$$

The inequality holds due to the fact that  $e^{-c(z-c)} \leq 1$  for  $z \geq c$ . Using a union bound we can then bound both sides as  $\Pr(|Z| > c) \leq e^{-c^2/2}$ . Finally, by setting  $Z = (X - \mu)/\sigma$  and  $c = \beta$  we obtain the bound stated above.  $\square$
